# Supplementary material for: γ-Brass type structures with I- and P-cell in the ternary Cu–Zn–In system
Source: publisher site journal article supplement (doi:10.1515/zkri-2020-0079), 2020-11-24
Supplement: Supplementary file 1 [file j_zkri-2020-0079_suppl_002.docx]

**Supporting Information**


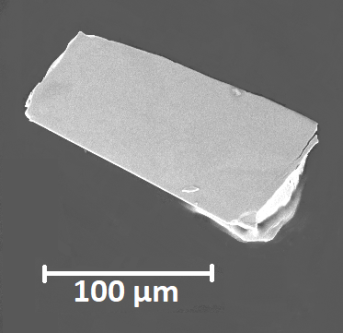

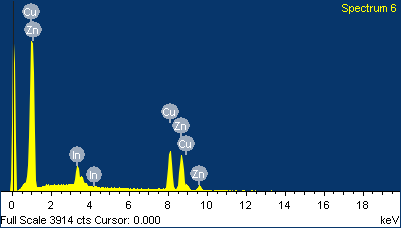
**
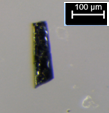
**

***Fig. SI1:*** *(Left) EDX spectra of a measured single crystal (inset) from Cu-Zn-In ternary system; (Right) A representative single crystal under optical microscope.*

**Table SI1:** A summary of loaded composition, refined composition, EDX composition and atomic decorations at different sites for γ-brass (*I*-43*m*) Cu-Zn-In phases

| Loaded composition | Refined composition | EDX composition | Atomic Model | | | |
| --- | --- | --- | --- | --- | --- | --- |
| M01 (8*c*)  Zn01 | M02 (8*c*)  Cu02 | M03 (12*e*)  Cu03 | M04 (24*g*)  Zn04/Cu04/In04 | |
| Cu4.5Zn4.7In0.8 | Cu4.599Zn4.764In0.637 | Cu4.51(6)Zn4.66(7)In0.83(3) | 1 | 1 | 1 | 0.70(8)/0.16/0.138 | |
| Cu4.6Zn4.5In0.9 | Cu4.683Zn4.514In0.803 |  | 1 | 1 | 1 | 0.64(15)/0.18/0.174 | |
| Cu4.6Zn4.6In0.8 | Cu4.622Zn4.626In0.752 | Cu4.63(6)Zn4.46(7)In0.90(4) | 1 | 1 | 1 | 0.67(18)/0.17/0.163 | |
| Cu4.6Zn4.7In0.7 | Cu4.646Zn4.722In0.632 | Cu4.59(5)Zn4.615(6)In0.79(2) | 1 | 1 | 1 | 0.69(7)/0.17/0.137 | |
| Cu4.7Zn4.5In0.8 | Cu4.699Zn4.627In0.674 | Cu4.72(8)Zn4.52(6)In0.76(3) | 1 | 1 | 1 | 0.67(11)/0.18/0.146 | |
| Cu4.7Zn4.7In0.6 | Cu4.715Zn4.662In0.623 | Cu4.70(4)Zn4.70(4)In0.60(2) | 1 | 1 | 1 | 0.7(2)/0.2/0.135 | |
| Cu4.8Zn4.4In0.8 | Cu4.833Zn4.396In0.771 | Cu4.90(5)Zn4.31(3)In0.79(6) | 1 | 1 | 1 | 0.62(19)/0.21/0.167 | |
| Cu4.9Zn4.3In0.8 | Cu4.949Zn4.315In0.736 | Cu4.86(8)Zn4.33(7)In0.80(4) | 1 | 1 | 1 | 0.60(19)/0.24/0.1594 | |

**Table SI2:** A summary of loaded composition, refined composition, EDX composition and atomic decorations at different sites for γ-brass (*P*-43*m*) Cu-Zn-In phases

| Loaded composition | Refined composition | EDX composition | | Atomic Model | | | | | | | |
| --- | --- | --- | --- | --- | --- | --- | --- | --- | --- | --- | --- |
|  | M01 (4*e*)  Zn01/In01 | | M02 (4*e*)  Cu02 | M03 (6*f*)  Cu03 | M04 (12*i*)  Zn04 | M11 (4*e*)  Cu11 | M12 (4*e*)  Cu12 | M13 (6*g*)  Cu13/In13 | M14 (12*i*)  Zn14/Cu14/In14 |
| Cu4.7Zn4.2In1.1 | Cu4.689Zn4.288In1.023 |  | 0.90(2)/0.10 | | 1 | 1 | 1 | 1 | 1 | 0.944(15)/0.056 | 0.56(19)/0.06/0.382 |
| Cu4.7Zn4.3In1.0 | Cu4.747Zn4.444In0.809 |  | 0.958(14)/0.042 | | 1 | 1 | 1 | 1 | 1 | 0.936(11)/0.063 | 0.61(16)/0.09/0.305 |
| Cu4.9Zn3.9In1.2 | Cu4.845Zn3.916In1.239 |  | 0.889(9)/0.111 | | 1 | 1 | 1 | 1 | 1 | 0.912(6)/0.088 | 0.40(12)/0.14/0.4556 |
| Cu4.9Zn4.0In1.1 | Cu4.946Zn3.970In1.084 | Cu4.89(4)Zn4.09(9)In1.02(2) | 0.920(6)/0.080 | | 1 | 1 | 1 | 1 | 1 | 0.922(5)/0.078 | 0.42(9)/0.18/0.404 |
| Cu4.9Zn4.1In1.0 | Cu4.858Zn4.083In1.059 | Cu4.91(4)Zn4.05(2)In1.03(3) | 0.903(11)/0.097 | | 1 | 1 | 1 | 1 | 1 | 0.915(9)/0.085 | 0.47(14)/0.15/0.384 |
| Cu4.9Zn4.2In0.9 | Cu4.898Zn4.182In0.920 | Cu4.76(5)Zn4.36(5)In0.87(4) | 0.922(19)/0.078 | | 1 | 1 | 1 | 1 | 1 | 0.950(12)/0.050 | 0.50(19)/0.15/0.3476 |
| Cu5.0Zn3.8In1.2 | Cu4.901Zn3.795In1.304 | Cu4.98(4)Zn3.78(4)In1.22(3) | 0.895(9)/0.105 | | 1 | 1 | 1 | 1 | 1 | 0.902(7)/0.098 | 0.35(14)/0.17/0.481 |
| Cu5.0Zn4.0In1.0 | Cu5.025Zn3.938In1.037 | Cu4.94(7)Zn3.97(7)In1.09(2) | 0.922(12)/0.078 | | 1 | 1 | 1 | 1 | 1 | 0.945(9)/0.055 | 0.40(17)/0.20/0.396 |

**Table SI3:** A summary of VEC, calculated from loaded and refined composition; and refined lattice constants

| **Nominal composition** | **VEC**  **[Loaded composition]** | **VEC**  **[Refined composition]** | ***a* (Å)**  **[SC refinement]** | ***a* (Å)**  **[powder refinement]** |
| --- | --- | --- | --- | --- |
| Cu4.5Zn4.7In0.8 | 1.63 | 1.6038 | 8.9942(10) | 8.9405(1) |
| Cu4.6Zn4.5In0.9 | 1.63 | 1.612 | 8.9519(10) | 8.9508(3) |
| Cu4.6Zn4.6In0.8 | 1.62 | 1.613 | 8.9476(10) | 8.9446(1) |
| Cu4.6Zn4.7In0.7 | 1.61 | 1.5986 | 8.9351(10) | 8.9286(2) |
| Cu4.7Zn4.2In1.1 | 1.64 | 1.6334 | 8.9692(5) | 8.9637(2) |
| Cu4.7Zn4.3In1.0 | 1.63 | 1.6062 | 8.9697(5) | 8.9587(2) |
| Cu4.7Zn4.5In0.8 | 1.61 | 1.5975 | 8.9461(10) | 8.9364(1) |
| Cu4.7Zn4.7In0.6 | 1.59 | 1.5909 | 8.9298(10) | 8.9125(2) |
| Cu4.8Zn4.4In0.8 | 1.60 | 1.5949 | 8.9329(10) | 8.9333(1) |
| Cu4.9Zn3.9In1.2 | 1.63 | 1.6394 | 8.9788(5) | 8.9789(1) |
| Cu4.9Zn4.0In1.1 | 1.62 | 1.6138 | 8.9776(5) | 8.9708(2) |
| Cu4.9Zn4.1In1.0 | 1.61 | 1.6201 | 8.9445(5) | 8.9552(3) |
| Cu4.9Zn4.2In0.9 | 1.60 | 1.6022 | 8.9453(5) | 8.9448(1) |
| Cu4.9Zn4.3In0.8 | 1.59 | 1.5787 | 8.9435(10) | 8.9278(1) |
| Cu5.0Zn3.8In1.2 | 1.62 | 1.6403 | 8.9883(5) | 8.9801(0) |
| Cu5.0Zn4.0In1.0 | 1.60 | 1.6012 | 8.9581(5) | 8.9534(1) |

**Table SI4:** Interatomic distances in Cu4.6Zn4.6In0.8 (C1) and Cu5.0Zn4.0In1.0 (C2) as determined from single crystal X-ray diffraction

| | Atom | Neighbor atom | Count | C1 | | --- | --- | --- | --- | | Zn01 | Cu03 | 3 | 2.6017(13) | |  | Cu02 | 3 | 2.6158(15) | |  | Zn04ǀCu04ǀIn04 | 3 | 2.6543(15) | |  | Zn01 | 3 | 2.7370(17) | | Cu02 | Zn04ǀCu04ǀIn04 | 3 | 2.5846(13) | |  | Zn01 | 3 | 2.6158(15) | |  | Zn04ǀCu04ǀIn04 | 3 | 2.6180(13) | |  | Cu03 | 3 | 2.7193(13) | | Cu03 | Zn04ǀCu04ǀIn04 | 2 | 2.5638(10) | |  | Cu03 | 1 | 2.5868(19) | |  | Zn01 | 2 | 2.6017(16) | |  | Cu02 | 2 | 2.7193(13) | |  | Zn04ǀCu04ǀIn04 | 4  2 | 2.8385(9)  2.8857(12) | | Zn04ǀCu04ǀIn04 | Cu03 | 1 | 2.5638(10) | |  | Cu02 | 1  1 | 2.5846(14)  2.6180(15) | |  | Zn01 | 1 | 2.6543(14) | |  | Zn04ǀCu04ǀIn04 | 4 | 2.6686(13) | |  | Cu03 | 2 | 2.8385(9) | | | Atom | Neighbor atom | Count | C2 | | --- | --- | --- | --- | | Zn01ǀIn01 | Zn04 | 3 | 2.5753(22) | |  | Cu03 | 3 | 2.5790(18) | |  | Cu02 | 3 | 2.6331(23) | |  | Zn01ǀIn01 | 3 | 2.8793(24) | | Cu02 | Zn04 | 3 | 2.5745(20) | |  | Zn01ǀIn01 | 3 | 2.6331(23) | |  | Zn14ǀCu14ǀIn14 | 3 | 2.6388(19) | |  | Cu03 | 3 | 2.7015(18) | | Cu03 | Zn14ǀCu14ǀIn14 | 2 | 2.5543(12) | |  | Zn01ǀIn01 | 2 | 2.5790(23) | |  | Cu03 | 1 | 2.6426(25) | |  | Cu02 | 2 | 2.7015(19) | |  | Zn04 | 4 | 2.8227(16) | | Zn04 | Cu02 | 1 | 2.5745(21) | |  | Zn01ǀIn01 | 1 | 2.5753(21) | |  | Cu13ǀIn13 | 1 | 2.5845(18) | |  | Cu12 | 1 | 2.6127(22) | |  | Zn14ǀCu14ǀIn14 | 2  2 | 2.6673(17)  2.6746(17) | |  | Cu03 | 2 | 2.8227(13) | | Cu11 | Cu12 | 3 | 2.6122(20) | |  | Cu13ǀIn13 | 3 | 2.6219(21) | |  | Cu11 | 3 | 2.6574(19) | |  | Zn14ǀCu14ǀIn14 | 3 | 2.7207(17) | | Cu12 | Zn14ǀCu14ǀIn14 | 3 | 2.5988(17) | |  | Cu11 | 3 | 2.6122(20) | |  | Zn04 | 3 | 2.6127(19) | |  | Cu13ǀIn13 | 3 | 2.7351(18) | | Cu13ǀIn13 | Cu13ǀIn13 | 1 | 2.5584(25) | |  | Zn04 | 2 | 2.5845(16) | | . | Cu11 | 2 | 2.6219(21) | |  | Cu12 | 2 | 2.7351(18) | |  | Zn14ǀCu14ǀIn14 | 4 | 2.8598(11) | | Zn14ǀCu14ǀIn14 | Cu03 | 1 | 2.5543(12) | |  | Cu12 | 1 | 2.5988(17) | |  | Cu02 | 1 | 2.6388(19) | |  | Zn04 | 2  2 | 2.6673(17)  2.6746(17) | |  | Cu11 | 1 | 2.7207(16) | |  | Cu13ǀIn13 | 2 | 2.8598(20) | |
| --- | --- | --- | --- | --- | --- | --- | --- | --- | --- | --- | --- | --- | --- | --- | --- | --- | --- | --- | --- | --- | --- | --- | --- | --- | --- | --- | --- | --- | --- | --- | --- | --- | --- | --- | --- | --- | --- | --- | --- | --- | --- | --- | --- | --- | --- | --- | --- | --- | --- | --- | --- | --- | --- | --- | --- | --- | --- | --- | --- | --- | --- | --- | --- | --- | --- | --- | --- | --- | --- | --- | --- | --- | --- | --- | --- | --- | --- | --- | --- | --- | --- | --- | --- | --- | --- | --- | --- | --- | --- | --- | --- | --- | --- | --- | --- | --- | --- | --- | --- | --- | --- | --- | --- | --- | --- | --- | --- | --- | --- | --- | --- | --- | --- | --- | --- | --- | --- | --- | --- | --- | --- | --- | --- | --- | --- | --- | --- | --- | --- | --- | --- | --- | --- | --- | --- | --- | --- | --- | --- | --- | --- | --- | --- | --- | --- | --- | --- | --- | --- | --- | --- | --- | --- | --- | --- | --- | --- | --- | --- | --- | --- | --- | --- | --- | --- | --- | --- | --- | --- | --- | --- | --- | --- | --- | --- | --- | --- | --- | --- | --- | --- | --- | --- | --- | --- | --- | --- | --- | --- | --- | --- | --- | --- | --- | --- | --- | --- | --- | --- | --- | --- | --- | --- | --- | --- | --- | --- | --- | --- | --- | --- | --- | --- | --- | --- | --- | --- | --- | --- | --- | --- | --- | --- | --- | --- | --- | --- | --- | --- | --- | --- | --- | --- |


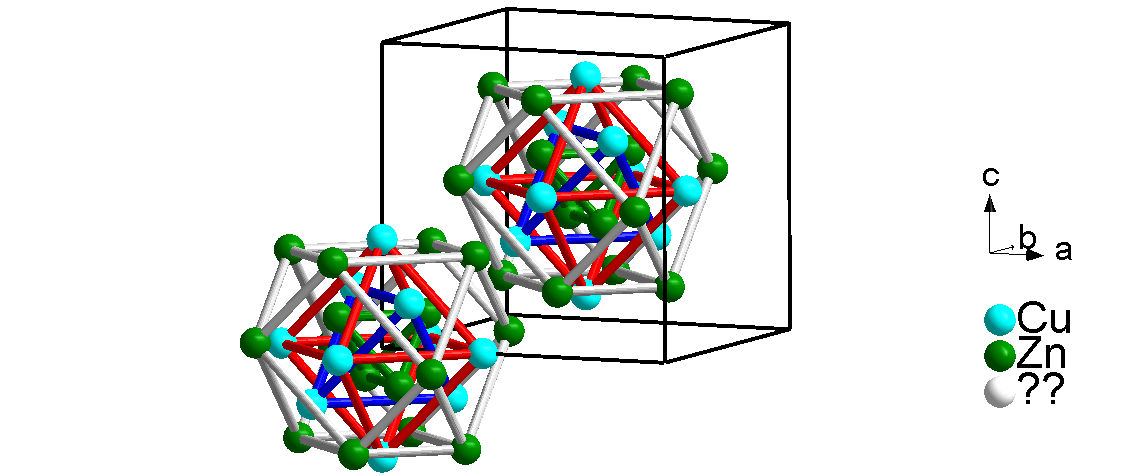

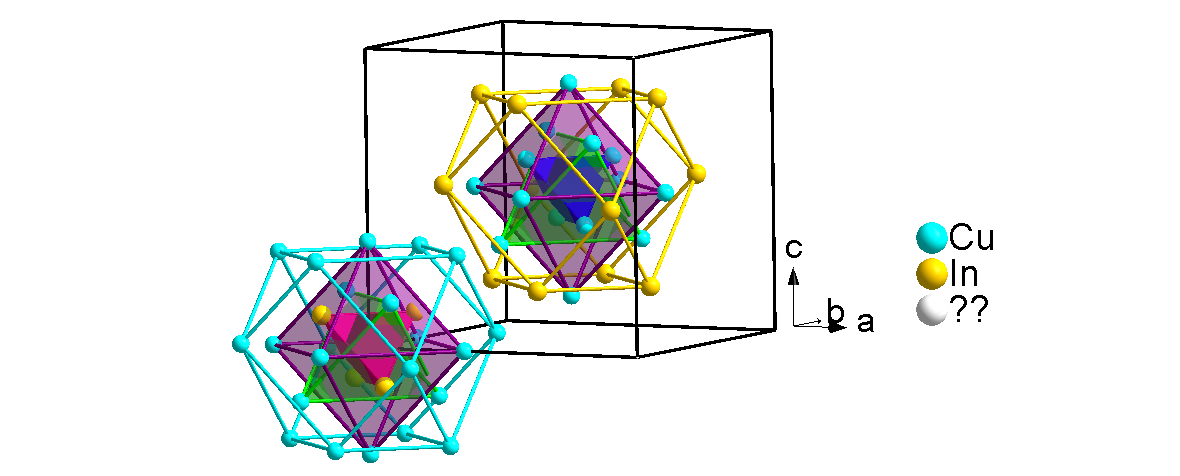

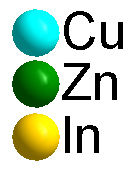

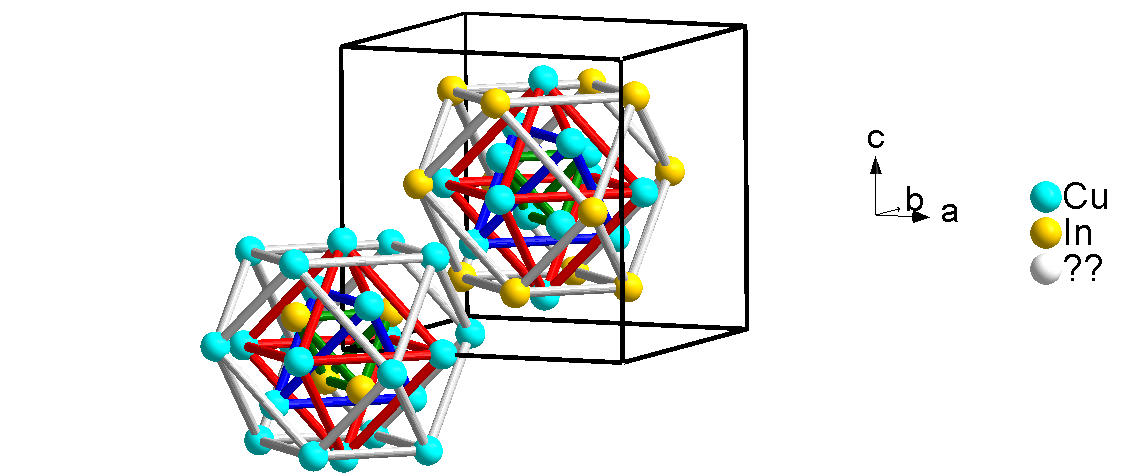


***Fig. SI2:*** *Crystal structure of I centered Cu5Zn8 (left) and P centered Cu9In4 (right). IT- deep green polyhedra, OT- blue polyhedra, OH- red polyhedra, CO- grey polyhedra.*

**Table SI5:** Phase analysis of synthesized samples

| **Sample ID** | **Loaded composition** | **EDX (at %)** | | | **Phases** | | | |
| --- | --- | --- | --- | --- | --- | --- | --- | --- |
| **Cu** | **Zn** | **In** | **Main phase (P/I)** | **In** | **CuZn** | **Malleable product** |
| P1 | Cu4.0Zn5.5In0.5 | 41.1(6) | 55.6(5) | 3.3(1) | + (I) | + |  |  |
| P2 | Cu4.4Zn4.7In0.9 | 44.9(5) | 47.7(5) | 7.4(3) | + (I) | + |  |  |
| P3 | Cu4.4Zn4.8In0.8 |  |  |  | + (I) | + |  |  |
| P4 | Cu4.4Zn4.9In0.7 | 44.1(6) | 49.4(7) | 6.5(3) | + (I) |  |  |  |
| P5 | Cu4.5Zn4.5In1.0 | 45.3(5) | 45.9(4) | 8.7(8) | + (I) | + |  |  |
| P6 | Cu4.5Zn4.6In0.9 | 45.5(4) | 46.3(6) | 8.2(4) | + (I) | + |  |  |
| P7 | Cu4.5Zn4.7In0.8 | 44.7(9) | 47.2(9) | 8.0(5) | + (I) |  |  |  |
| P8 | Cu4.5Zn4.8In0.7 | 44.5(4) | 48.2(4) | 7.2(2) | + (I) |  |  |  |
| P9 | Cu4.5Zn4.9In0.6 | 45.3(4) | 48.7(4) | 6.0(2) | + (I) |  |  |  |
| P10 | Cu4.5Zn5.0In0.5 | 45.1(5) | 50.1(4) | 4.8(3) | + (I) |  |  |  |
| P11 | Cu4.6Zn4.0In1.4 | 47.7(7) | 41.3(4) | 10.9(4) | + (P) | + |  |  |
| P12 | Cu4.6Zn4.3In1.1 | 46.5(3) | 43.9(4) | 9.6(6) | + (I) | + |  |  |
| P13 | Cu4.6Zn4.4In1.0 | 46.2(5) | 45.0(5) | 9.1(5) | + (I) | + |  |  |
| P14 | Cu4.6Zn4.5In0.9 | 45.7(3) | 45.4(4) | 8.9(2) | + (I) |  |  |  |
| P15 | Cu4.6Zn4.6In0.8 | 46.0(2) | 45.3(5) | 8.7(6) | + (I) |  |  |  |
| P16 | Cu4.6Zn4.7In0.7 | 45.8(3) | 47.1(4) | 7.1(4) | + (I) |  |  |  |
| P17 | Cu4.6Zn4.8In0.6 | 46.2(4) | 47.7(4) | 6.1(2) | + (I) |  |  |  |
| P18 | Cu4.6Zn4.9In0.5 | 45.8(2) | 49.0(5) | 5.0(5) | + (I) |  |  |  |
| P19 | Cu4.7Zn4.1In1.2 | 47.8(6) | 41.2(6) | 11.0(5) | + (P) | + |  |  |
| P20 | Cu4.7Zn4.2In1.1 | 47.2(5) | 42.3(6) | 10.4(4) | + (P) | + |  |  |
| P21 | Cu4.7Zn4.3In1.0 | 47.2(5) | 43.2(5) | 9.5(6) | + (P/I) |  |  |  |
| P22 | Cu4.7Zn4.4In0.9 | 46.8(2) | 44.0(5) | 9.2(3) | + (I) |  |  |  |
| P23 | Cu4.7Zn4.5In0.8 | 47.3(3) | 44.6(6) | 8.2(3) | + (I) |  |  |  |
| P24 | Cu4.7Zn4.6In0.7 | 46.8(5) | 45.9(9) | 6.8(5) | + (I) |  |  |  |
| P25 | Cu4.7Zn4.7In0.6 | 47.0(7) | 46.5(5) | 6.3(6) | + (I) |  |  |  |
| P26 | Cu4.7Zn4.8In0.5 | 46.1(3) | 48.2(4) | 4.7(4) | + (I) |  |  |  |
| P27 | Cu4.8Zn3.9In1.3 | 48.8(7) | 39.7(3) | 11.7(6) | + (P) | + |  |  |
| P28 | Cu4.8Zn4.0In1.2 | 48.2(5) | 40.6(7) | 11.3(4) | + (P) | + |  |  |
| P29 | Cu4.8Zn4.1In1.1 | 48.0(5) | 41.6(6) | 10.5(6) | + (P) |  |  |  |
| P30 | Cu4.8Zn4.2In1.0 | 48.8(7) | 41.6(6) | 10.2(8) | + (P) |  |  |  |
| P31 | Cu4.8Zn4.3In0.9 | 47.8(8) | 42.9(7) | 9.2(4) | + (P/I) |  |  |  |
| P32 | Cu4.8Zn4.4In0.8 | 48.5(3) | 43.5(5) | 7.9(6) | + (I) |  |  |  |
| P33 | Cu4.8Zn4.5In0.7 | 47.8(6) | 45.5(4) | 6.9(3) | + (I) |  |  |  |
| P34 | Cu4.8Zn4.6In0.6 | 47.3(6) | 46.5(5) | 6.2(6) | + (I) |  |  | + |
| P35 | Cu4.9Zn3.8In1.3 | 48.2(5) | 38.8(9) | 12.5(7) | + (P) | + |  |  |
| P36 | Cu4.9Zn3.9In1.2 | 48.5(7) | 39.7(5) | 11.8(4) | + (P) |  |  |  |
| P37 | Cu4.9Zn4.0In1.1 | 49.4(3) | 40.5(5) | 11.1(3) | + (P) |  |  |  |
| P38 | Cu4.9Zn4.1In1.0 | 48.6(4) | 41.3(6) | 10.5(2) | + (P) |  |  |  |
| P39 | Cu4.9Zn4.2In0.9 | 49.3(5) | 41.7(8) | 9.2(6) | + (P) |  |  |  |
| P40 | Cu4.9Zn4.3In0.8 | 49.0(4) | 42.5(3) | 8.5(5) | + (P/I) |  |  |  |
| P41 | Cu4.9Zn4.4In0.7 | 48.8(6) | 44.7(5) | 7.2(1) | + (I) |  | + |  |
| P42 | Cu4.9Zn4.5In0.6 |  |  |  | + (I) |  | + |  |
| P43 | Cu5.0Zn3.5In1.5 | 50.1(2) | 36.0(1) | 13.9(9) | + (P) | + |  |  |
| P44 | Cu5.0Zn3.6In1.4 | 50.0(7) | 36.9(6) | 13.1(4) | + (P) |  |  |  |
| P45 | Cu5.0Zn3.7In1.3 | 49.9(5) | 36.5(5) | 13.5(7) | + (P) |  |  |  |
| P46 | Cu5.0Zn3.8In1.2 | 49.7(6) | 38.3(3) | 12.0(4) | + (P) |  |  |  |
| P47 | Cu5.0Zn3.9In1.1 | 49.9(3) | 39.0(5) | 11.1(3) | + (P) |  |  |  |
| P48 | Cu5.0Zn4.0In1.0 | 49.8(7) | 39.5(5) | 10.7(7) | + (P) |  |  |  |
| P49 | Cu5.0Zn4.1In0.9 | 50.2(5) | 41.1(2) | 8.9(4) | + (P) |  |  |  |
| P50 | Cu5.0Zn4.2In0.8 |  |  |  | + (p) |  | + |  |
| P51 | Cu5.0Zn4.3In0.7 |  |  |  | + (I) |  | + |  |
| P52 | Cu5.0Zn4.4In0.6 |  |  |  | + (I) |  |  | + |
| P53 | Cu5.1Zn3.6In1.3 | 50.9(9) | 35.6(3) | 13.1(8) | + (P) |  |  |  |
| P54 | Cu5.1Zn3.7In1.2 | 51.1(5) | 36.9(5) | 12.6(3) | + (P) |  |  |  |
| P55 | Cu5.1Zn3.8In1.1 | 50.8(4) | 38.3(6) | 10.8(6) | + (P) |  |  |  |
| P56 | Cu5.1Zn3.9In1.0 | 51.0(5) | 39.0(4) | 9.9(5) | + (P) |  |  |  |
| P57 | Cu5.1Zn4.0In0.9 | 50.7(10) | 39.6(6) | 9.8(5) | + (P) |  |  |  |
| P58 | Cu5.1Zn4.1In0.8 |  |  |  | + (P) |  | + |  |
| P59 | Cu5.1Zn4.2In0.7 |  |  |  | + (P) |  | + |  |
| P60 | Cu5.2Zn3.5In1.3 | 52.4(8) | 34.7(3) | 12.8(6) | + (P) |  |  |  |
| P61 | Cu5.2Zn3.6In1.2 |  |  |  | + (P) |  |  |  |
| P62 | Cu5.2Zn3.7In1.1 | 51.0(8) | 37.1(7) | 11.8(2) | + (P) |  |  |  |
| P63 | Cu5.2Zn3.8In1.0 |  |  |  | + (P) |  | + |  |
| P64 | Cu5.2Zn3.9In0.9 |  |  |  | + (P) |  | + |  |
| P65 | Cu5.2Zn4.0In0.8 |  |  |  | + (P) |  |  | + |
| P66 | Cu5.3Zn3.6In1.1 | 52.4(3) | 35.7(1) | 11.8(5) | + (P) |  |  |  |
| P67 | Cu5.3Zn3.7In1.0 |  |  |  | + (P) |  | + |  |
| P68 | Cu5.3Zn3.8In0.9 |  |  |  | + (P |  | + |  |
| P69 | Cu5.4Zn3.6In1.0 |  |  |  | + (P) |  | + |  |
| P70 | Cu5.4Zn4.0In0.6 |  |  |  | + (P) |  |  | + |
